# Supplementary material
Source: publisher figshare collection journal article supplement (https://acs.figshare.com/ndownloader/files/4495630)

## Supporting Information

### **Morphologies of self-organizing regioregular conjugated polymer/fullerene aggregates in thin film solar cells**

**Mao-Yuan Chiu, U-Ser Jeng, Ming-Shin Su and Kung-Hwa Wei\***

The radius of gyration ( $R_g$ ) of a PCBM aggregate can be determined from the scattering peak intensity, using the Guinier approximation

$$I(Q) = I(0) \exp\left(-\frac{Q^2 R_g^2}{3}\right) \quad (1)$$

where  $I(Q)$  is the scattering intensity;  $I(0)$  is the zero-angle scattering intensity;  $Q$  is the scattering vector; and  $R_g$  is the radius of gyration of the PCBM clusters. Figure S3 presents plots of  $\ln I(Q)$  versus  $Q^2$  that were fitted using Equation 1 (solid lines) in the low- $Q$  range. The values of  $R_g$  can be extracted from the slopes ( $-R_g^2/3$ ) of the fitted lines.

The out-of-plane electron and hole mobilities were determined by fitting the dark current density–voltage curves of the devices into the space-charge-limited current (SCLC) model, based on the equation

$$J = \frac{9}{8} \varepsilon_0 \varepsilon_r \mu_{h(e)} \frac{V^2}{L^3}$$

where  $\varepsilon_0$  is the permittivity of free space,  $\varepsilon_r$  is the dielectric constant of the materials,  $\mu_{h(e)}$  is the hole (electron) mobility,  $V$  is the voltage drop across the device, and  $L$  is

the active layer thickness.

Figure S1 GISAXS pattern of the P3HT/PCBM blend film incorporating 55 wt% PCBM and a schematic representation of the device structure.

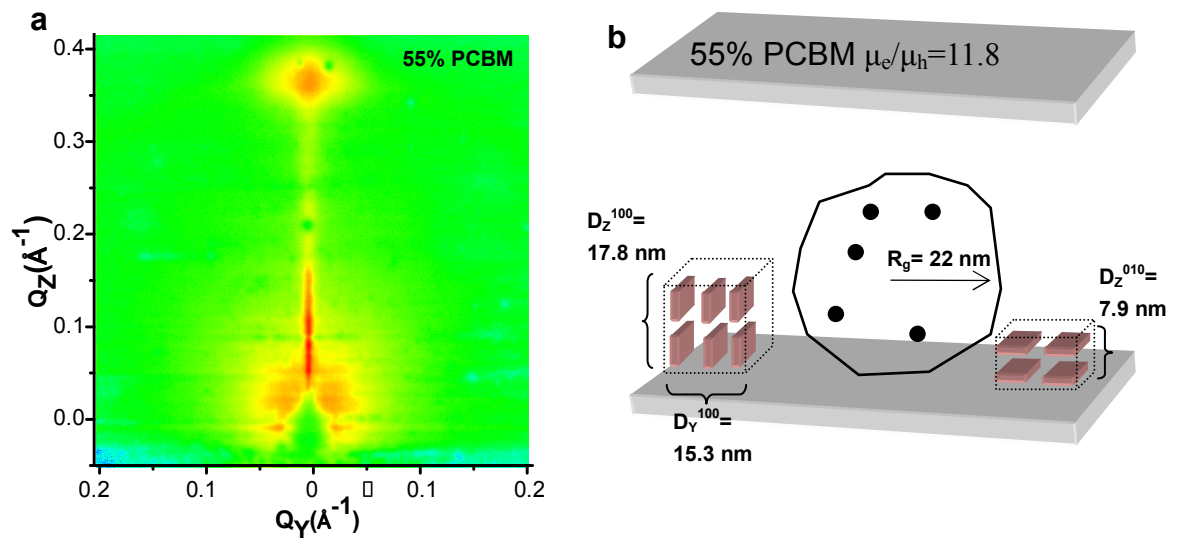

Figure S2 Profiles of azimuthal angles at  $Q_{(100)}$ , extracted from the GISAXS 2D pattern. Inset: Defining the spread angle of the P3HT chains on the substrates. When the P3HT molecules were aligned edge- and face-on to the substrates, the azimuthal angles were designated as 0 and 90°, respectively.

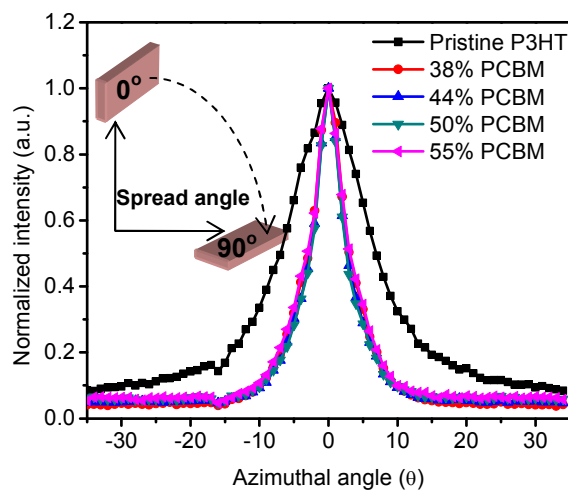

Figure S3 Plots of  $\ln I(Q)$  versus  $Q^2$  for the GISAXS data of P3HT/PCBM films, measured with a large sample-to-detector distance of 3219 mm for an improved low- $Q$  resolution. The data are fitted using the Guinier approximation (solid lines). Polydispersity effect of the PCBM aggregation is estimated using the two fitted lines for the upper- ( $R_g^1$ ) and lower-limit ( $R_g^2$ ); the fitted  $R_g$  values are summarized in the Table below. Averaged  $R_g$  values are used in the text.

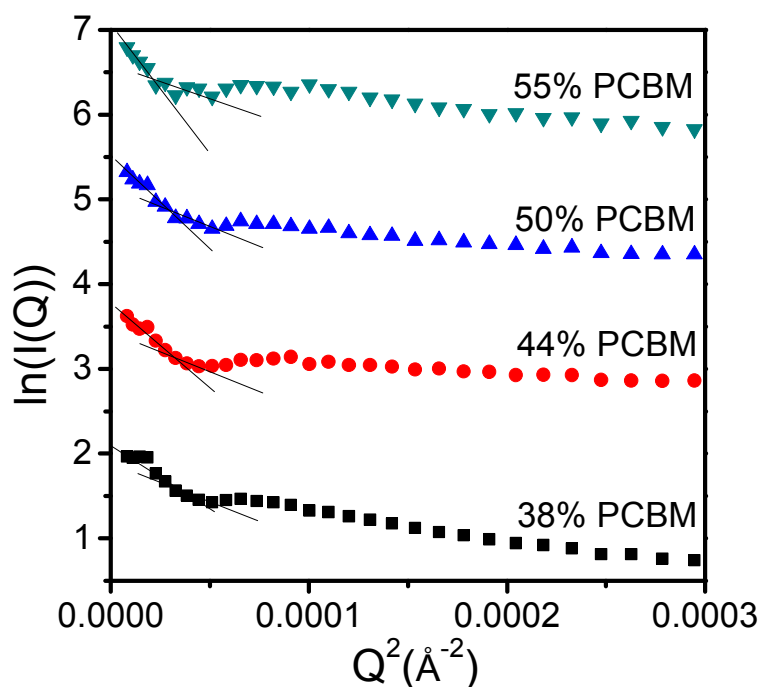

| PCBM by weight<br>in P3HT | $R_g^1$ (nm) | $R_g^2$ (nm) | $R_g^{average}$ (nm) |
|---------------------------|--------------|--------------|----------------------|
| 38%(1:0.6)                | 18.7         | 17.2         | 18.0                 |
| 44%(1:0.8)                | 22.4         | 18.3         | 20.4                 |
| 50%(1:1)                  | 25.3         | 17.9         | 21.6                 |
| 55%(1:1.2)                | 29.6         | 14.2         | 21.9                 |

Figure S4: Dark  $J$ - $V$  curves for (a) electron- and (b) hole-dominated carrier devices of P3HT/PCBM incorporating various PCBM loadings, annealed at 150 °C for 15 min.

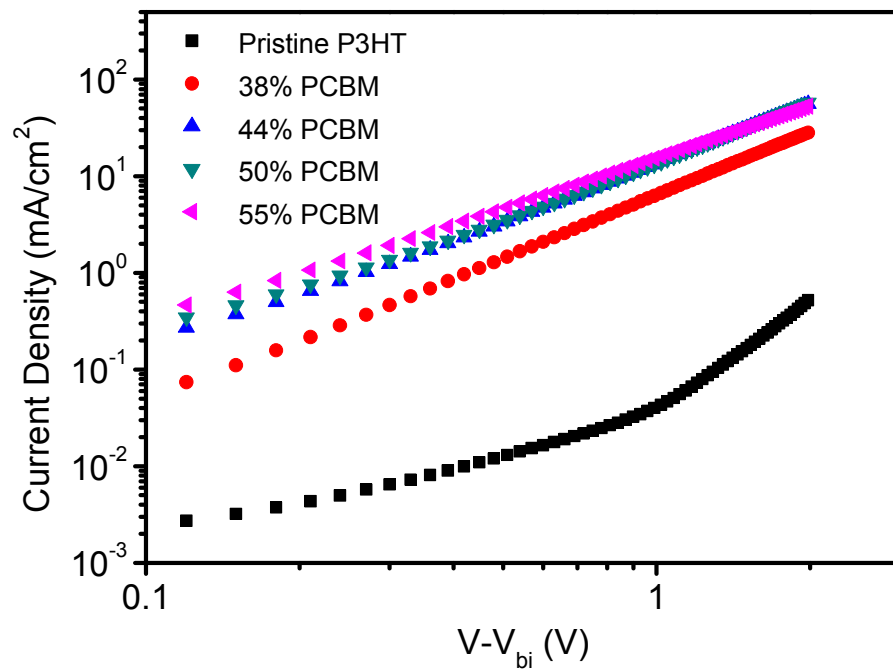

(a)

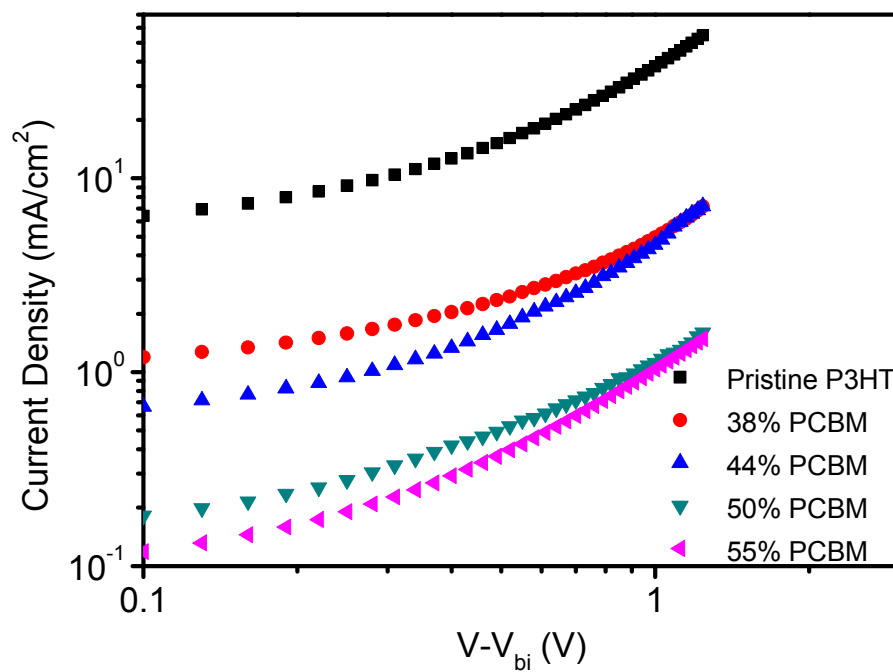

(b)

Figure S5: Current density–voltage characteristics under illumination of devices incorporating P3HT films containing various weight percentages of PCBM, after annealing at 150 °C for 15 min.

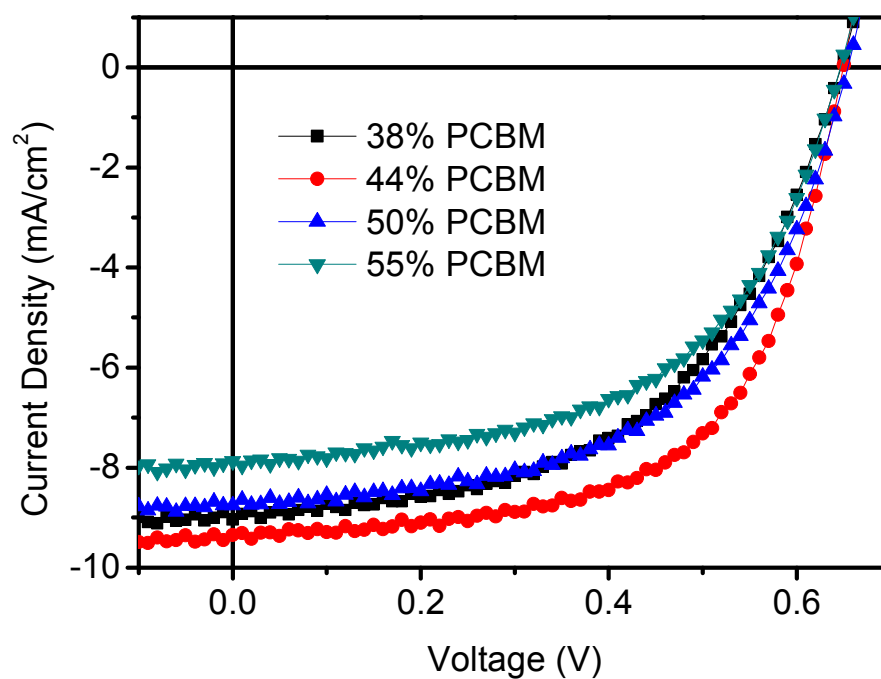

Supplement: Supplementary file 1 [file 4495630]
